# Supplementary material for: Temperature-responsive binary superlattices prepared by the selective solvent evaporation of O/W microemulsion composed of gold nanoparticles and surfactants
Source: Royal Society of Chemistry journal article supplement (doi:10.1039/d3nr01972a), 2023-01-01
Supplement: d3nr01972a1.pdf [file d3nr01972a1.pdf]

# Supporting Information

## Temperature-Responsive Binary Superlattices Prepared by Selective Solvent Evaporation of O/W Microemulsion Composed of Gold Nanoparticles and Surfactants

Young-Jin Yoon<sup>[1,2]</sup>, Jae-Min Ha<sup>[3]</sup>, Hyuk-Jin Seo<sup>[1,2]</sup>, Jong Dae Jang<sup>[4]</sup>, Changwoo Do<sup>[5]</sup>, Tae-  
Hwan Kim<sup>\*[1,2,6,7]</sup>

<sup>[1]</sup>Department of Applied Plasma & Quantum Beam Engineering, Jeonbuk National  
University, Jeonju 54896, Republic of Korea

<sup>[2]</sup>Research Center for Advanced Nuclear Interdisciplinary Technology, Jeonbuk National  
University, Jeonju 54896, Republic of Korea

<sup>[3]</sup>Samsung Electronics, Hwaseong, Gyeonggi 18448, Republic of Korea

<sup>[4]</sup>Neutron Science Division, Korea Atomic Energy Research Institute, 1045 Daedeok-daero,  
Yuseong-gu, Daejeon 34057, Republic of Korea

<sup>[5]</sup>Neutron Scattering Division, Neutron Sciences Directorate, Oak Ridge National Laboratory,  
Oak Ridge, Tennessee 37831, United States

<sup>[6]</sup>Department of Quantum System Engineering, Jeonbuk National University, Jeonju 54896,  
Republic of Korea

<sup>[7]</sup>High-Enthalpy Plasma Research Center, Jeonbuk National University, 546 Bongdong-ro,  
Bongdong-eup, Wanju-gun, Jeollabuk-do, 55317, Republic of Korea.

- SAXS intensities of Brij58 surfactant at 35, 40 and 50 wt.% in water

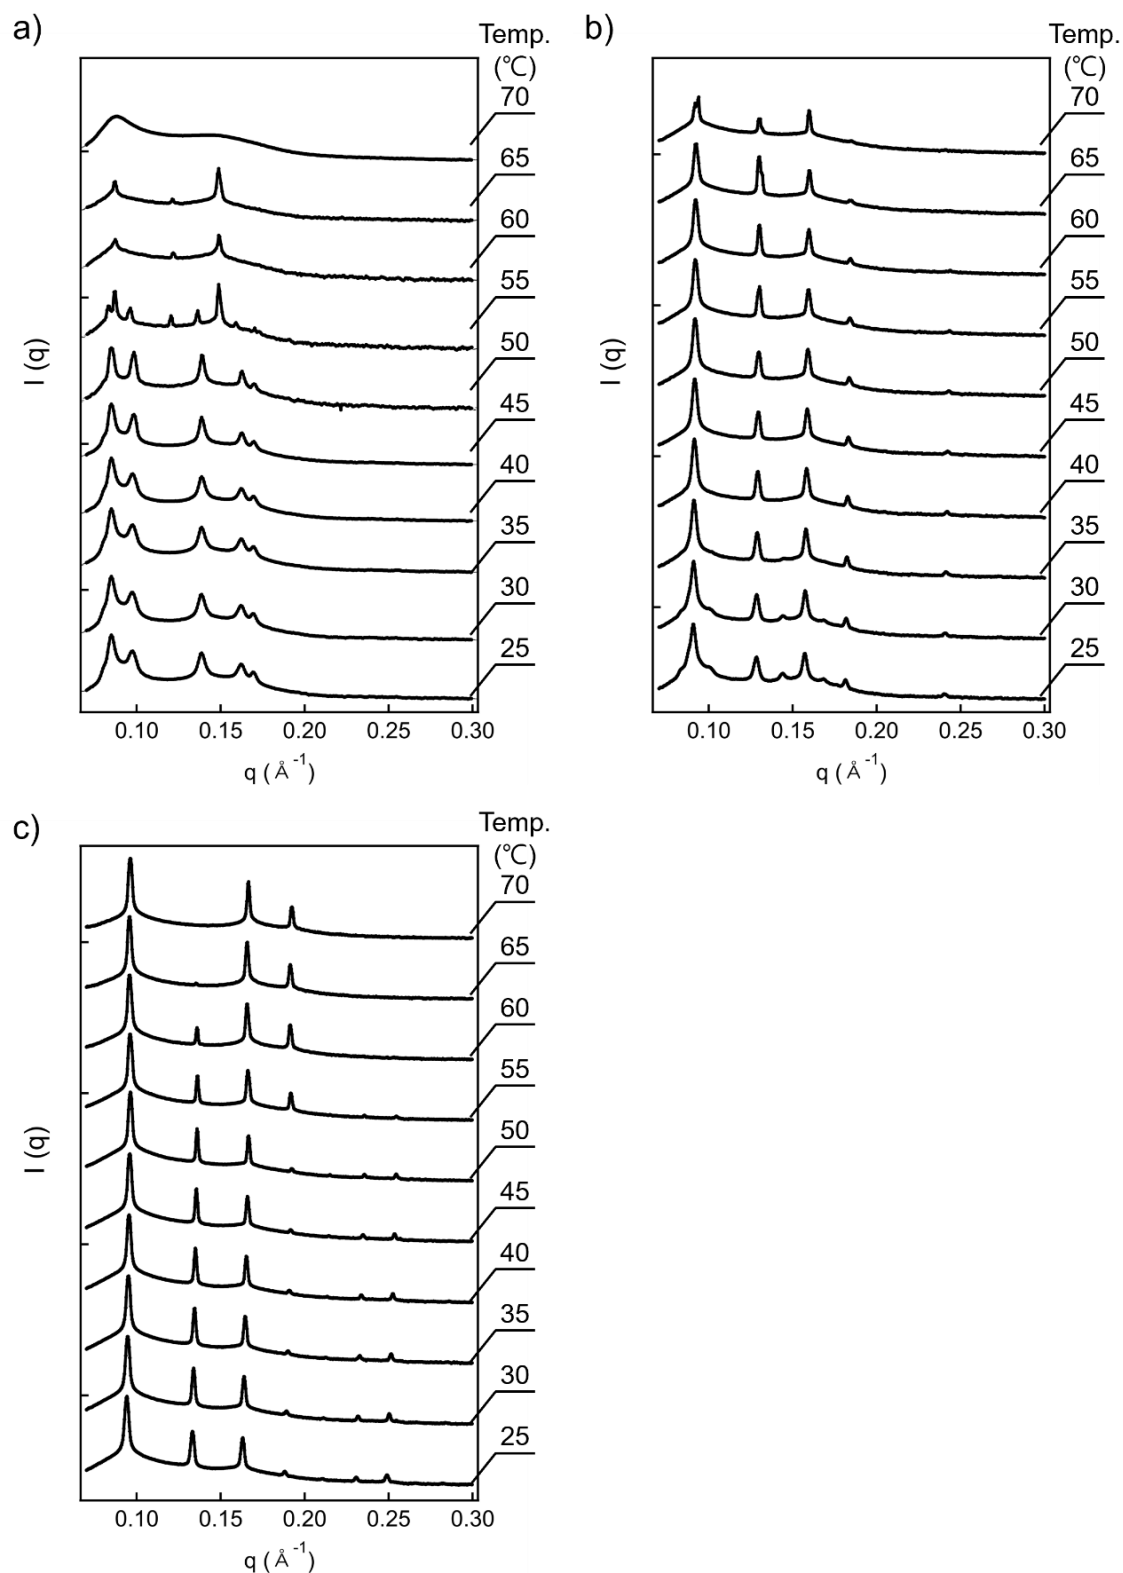

**Fig. S1.** SAXS intensities of Brij58 in aqueous solution at a different mass fraction of a) 35, b) 40, and c) 50 wt. %. All SAXS intensities are shifted vertically for visual clarity.

- Transmission Electron Microscopy (TEM) image of the Birj58/AuNP4.1/water after sonication.

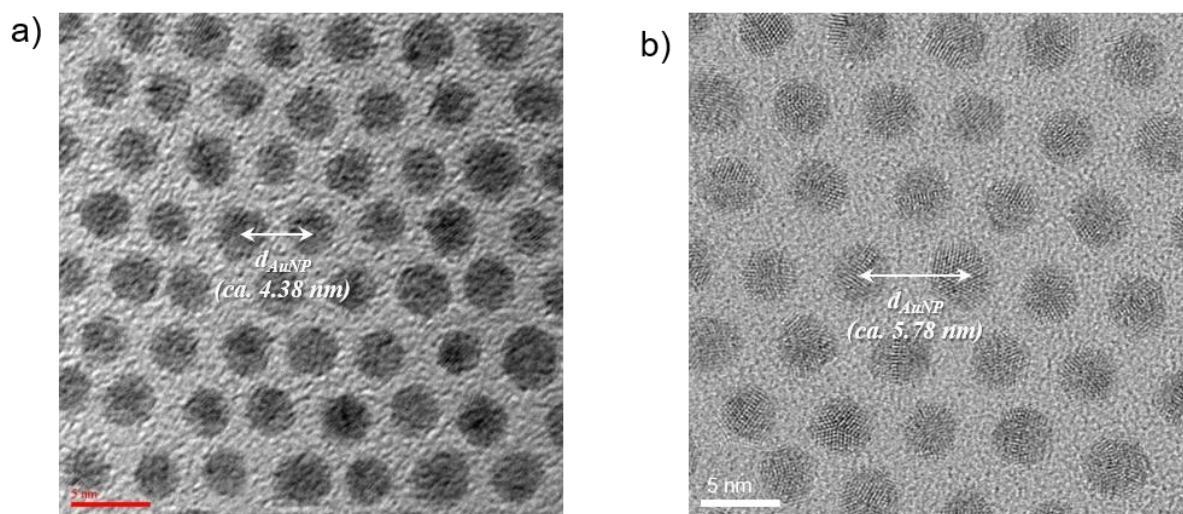

**Fig. S2.** (a) TEM image of AuNP4.1 only and (b) a Birj58/AuNP4.1/water complex before secondary evaporation (where the sample for TEM measurement was collected by centrifugation in pallet form and then redispersed in water). The center-to-center distances of the AuNPs ( $d_{\text{AuNP}}$ ) in the AuNP4.1 and the Birj58/AuNP4.1/water complex were estimated to be 4.38 nm and 5.78 nm, respectively, indicating the increase of  $d_{\text{AuNP}}$  upon the successful encapsulation of AuNP surface.

- SAXS intensities of the Brij58/AuNP4.1/water complexes at the different concentrations.

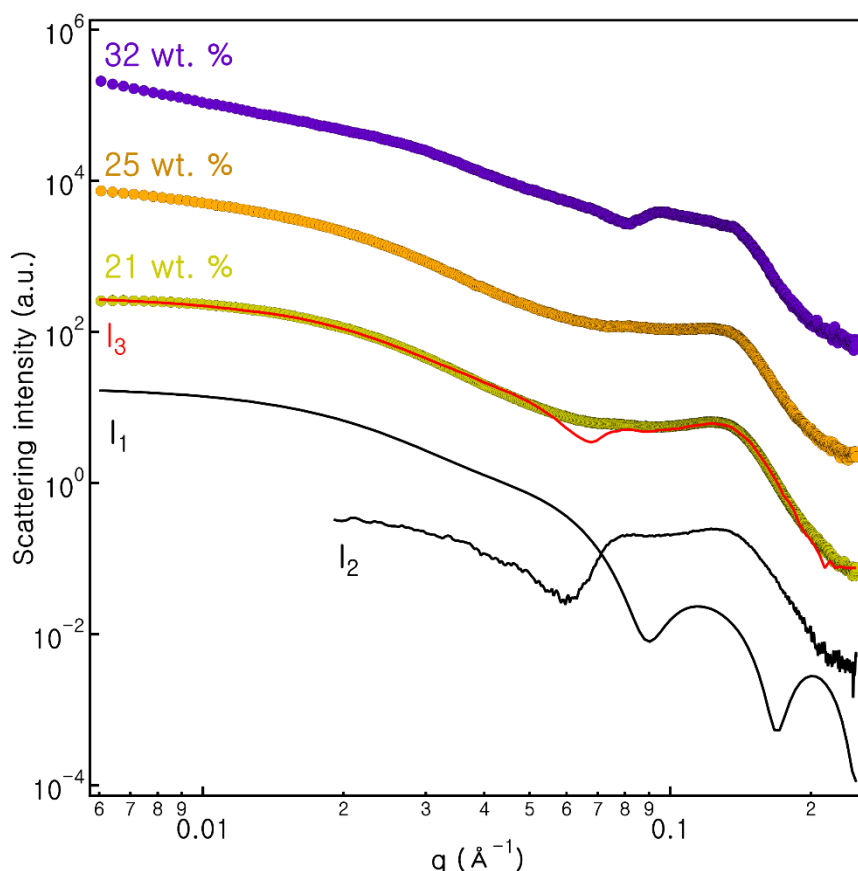

**Fig. S3.** SAXS intensities of the Brij58/AuNP4.1/water complexes at the different concentrations of 21 (yellow), 25 (orange), and 32 (violet) wt. % and the Brij58 at 20 wt. % ( $I_2$ ) in water.  $I_1$  is the simulated intensity for the core-shell particle consisted of the core of 4 nm and the shell thickness of 7.6 nm (which describes the surfactant-encapsulated AuNPs), and  $I_3$  is a sum of the  $I_1$  and  $I_2$ . Herein, we did not consider the interparticle interference between the surfactant micelle to core-shell AuNP because it could not be independently measured in the complex system. The SAXS intensities of the Brij58/AuNP4.1/water complexes (21 wt. %) was successfully reproduced by a sum of the  $I_1$  and  $I_2$ , indicating that the complex is a mixture of the surfactant micelles and the surfactant-encapsulated AuNPs. Since all the SAXS intensities are not quite different, we expect that the structure of the Brij58/AuNP4.1/water complexes still remains even though the concentration increases.

- SAXS intensities of the Brij58/AuNP2.1/water complexes at the different  $m_p$

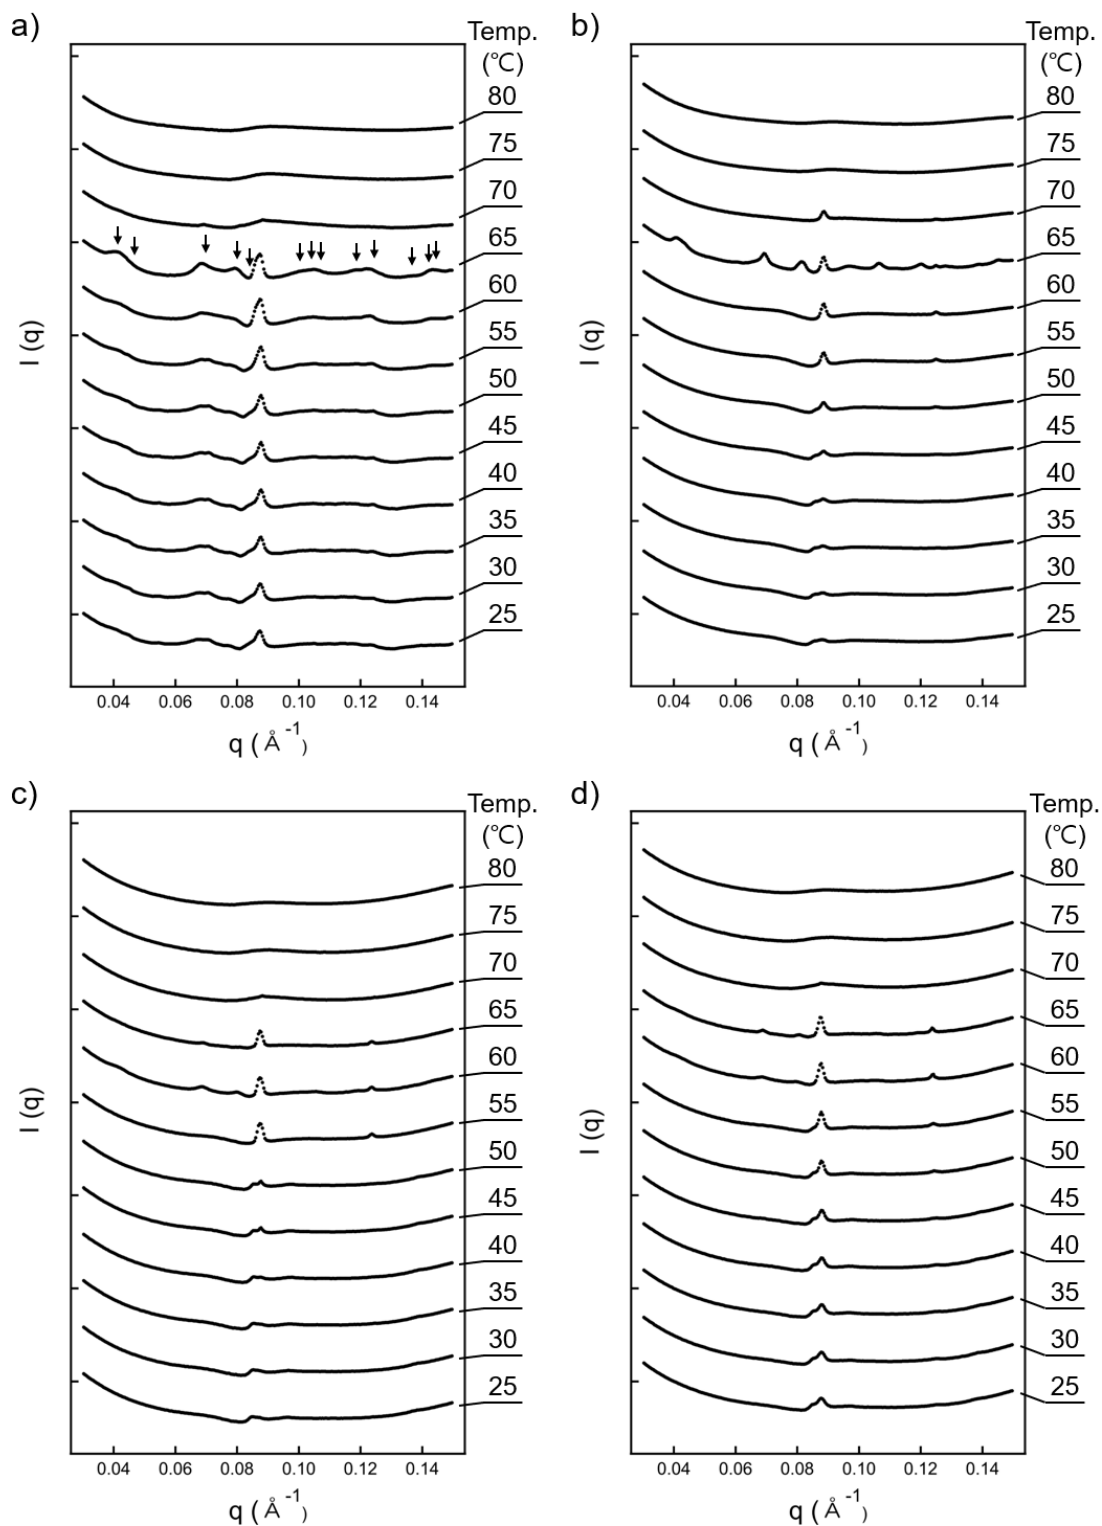

**Fig. S4.** SAXS intensities of the Brij58/AuNP2.1/water complexes at the different  $m_p$  of a) 0.6, b) 1.3, c) 1.9, and d) 3.1. All SAXS intensities are shifted vertically for visual clarity. The black arrows indicate the Bragg reflection peaks corresponding to  $\text{Li}_3\text{Bi}$ -type BNSLs structure.

- SAXS intensities of the Brij58/AuNP4.1/water complexes at the different  $m_p$

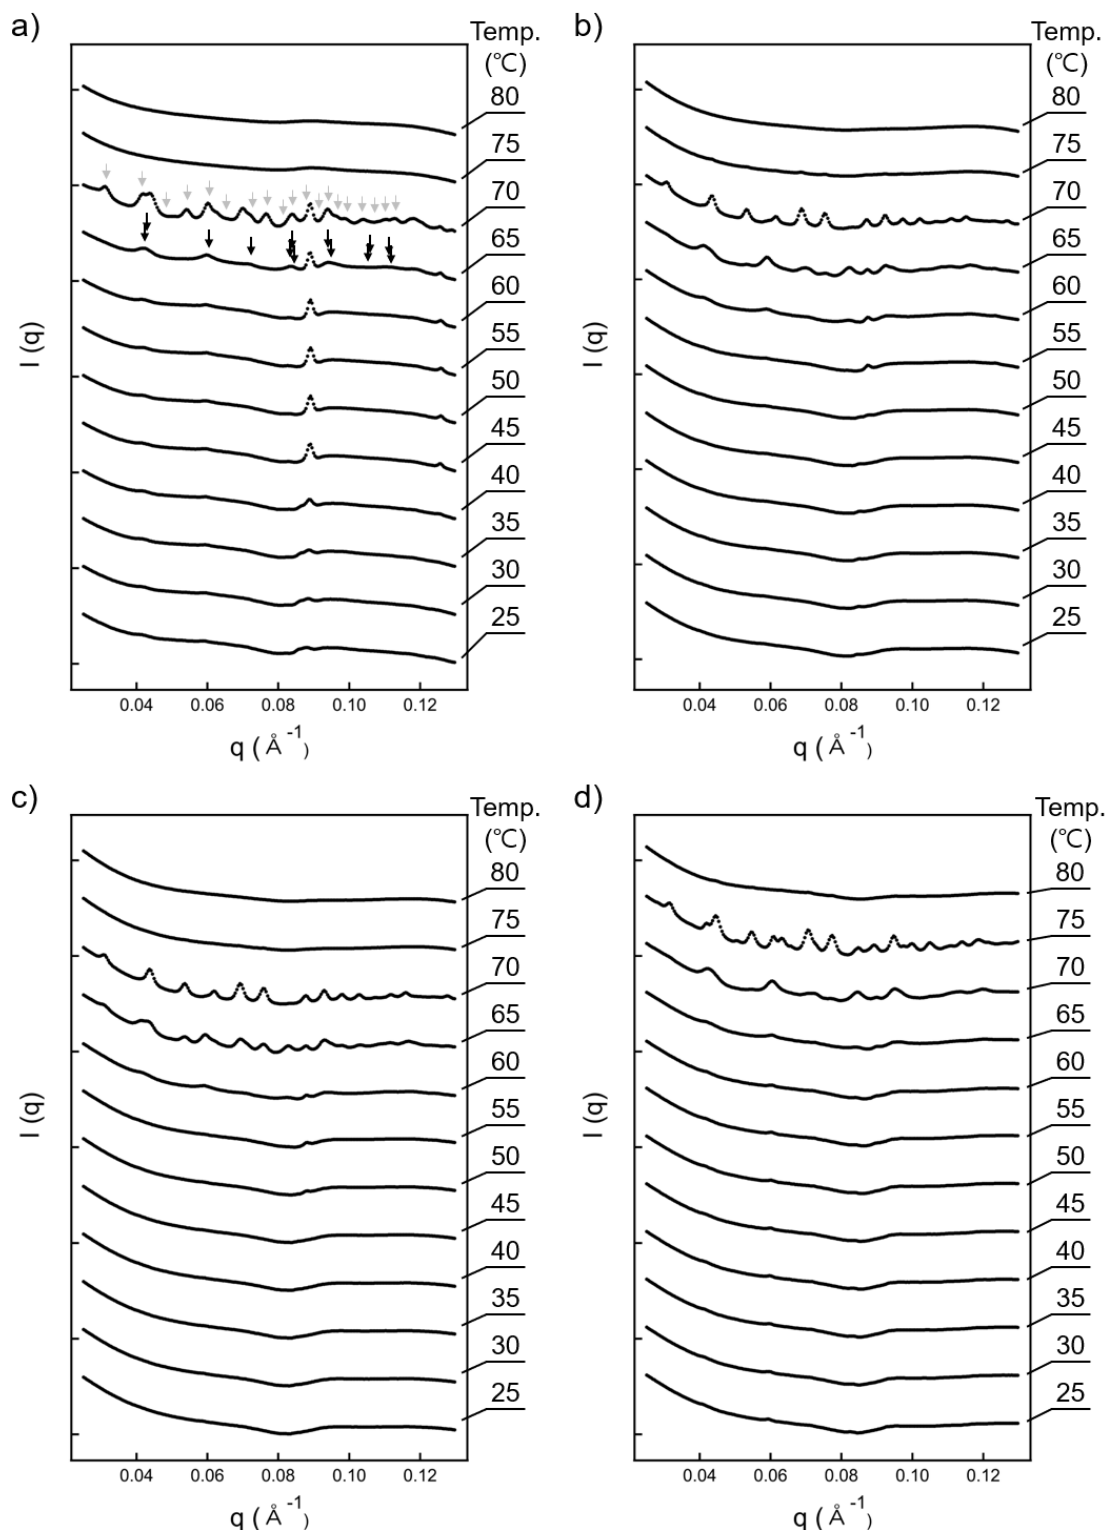

**Fig. S5.** SAXS intensities of the Brij58/AuNP4.1/water complexes at the different  $m_p$  of a) 1.3, b) 1.9, c) 3.1, and d) 5.0. All SAXS intensities are shifted vertically for visual clarity. The black and gray arrows indicate the Bragg reflection peaks corresponding to  $\text{AIB}_2^-$  and  $\text{NaZn}_{13}$ -type BNSLs structure, respectively.

- SAXS intensities of the Brij58/AuN4.6/water complexes at the different  $m_p$

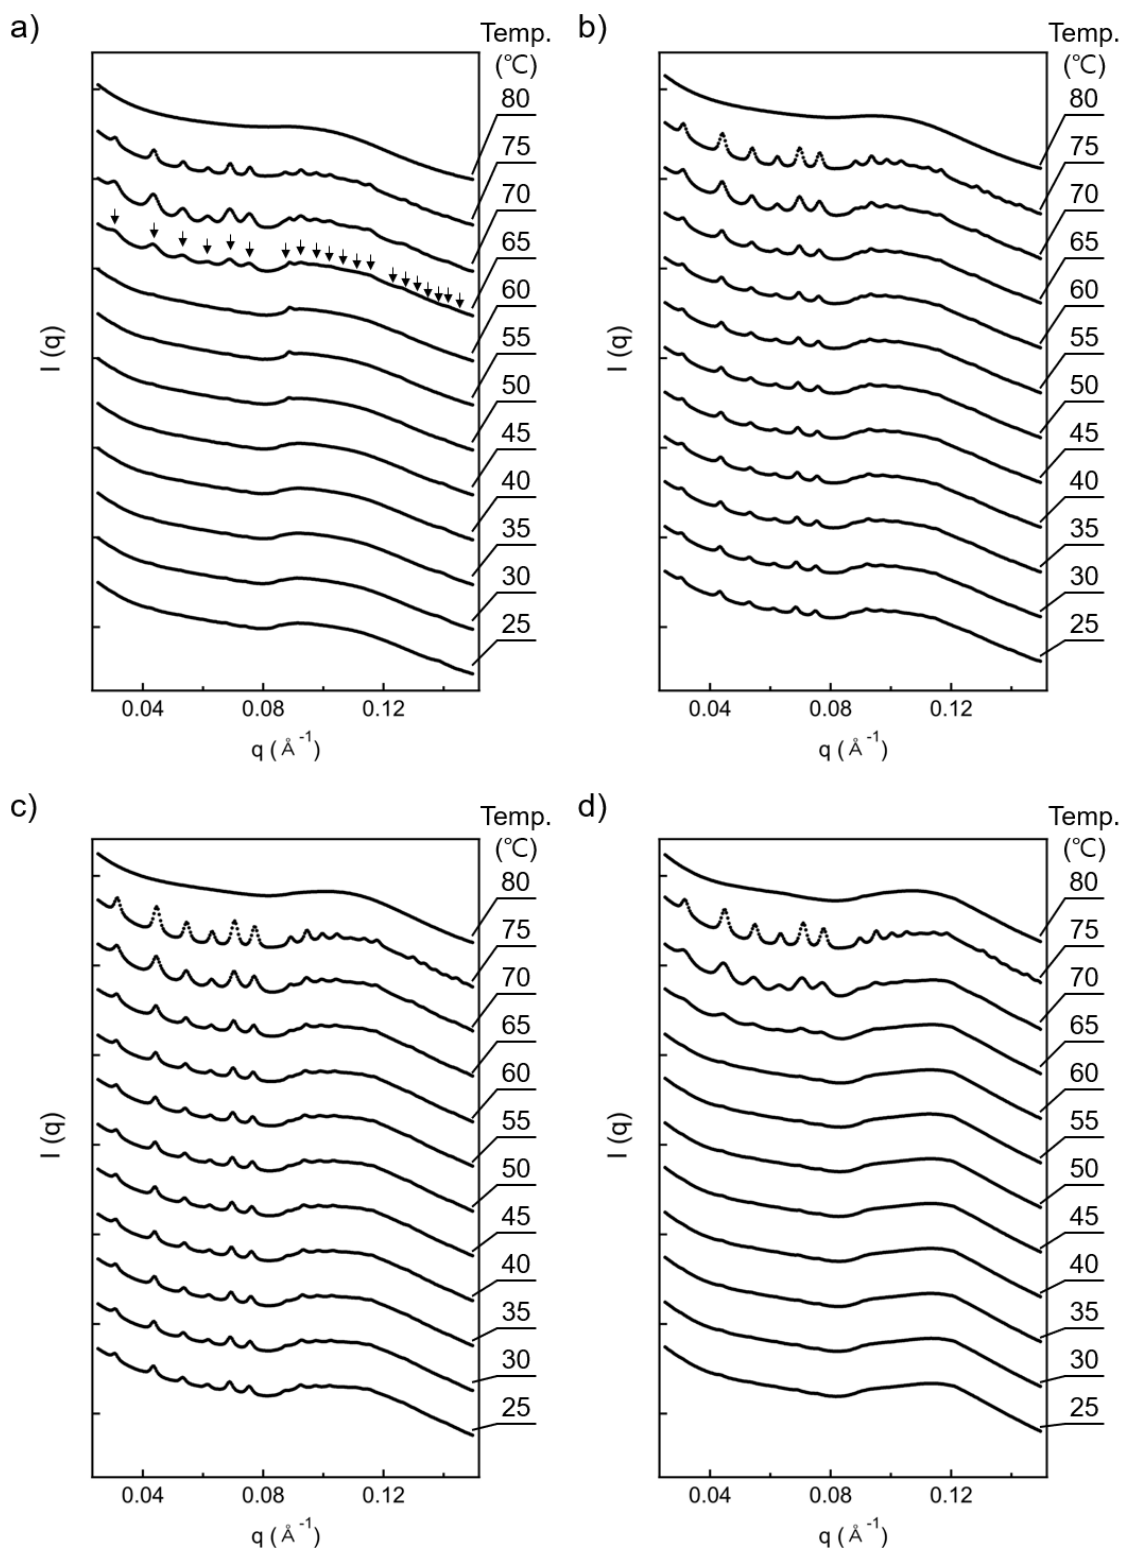

**Fig. S6.** SAXS intensities of the Brij58/AuNP4.6/water complexes at the different  $m_p$  of a) 1.9, b) 3.1, c) 5.0, and d) 7.5. All SAXS intensities are shifted vertically for visual clarity. The black arrows indicate the Bragg reflection peaks corresponding to  $\text{NaZn}_{13}$ -type BNSLs structure.

- Lattice parameters obtained from SAXS analysis of Brij58 surfactant

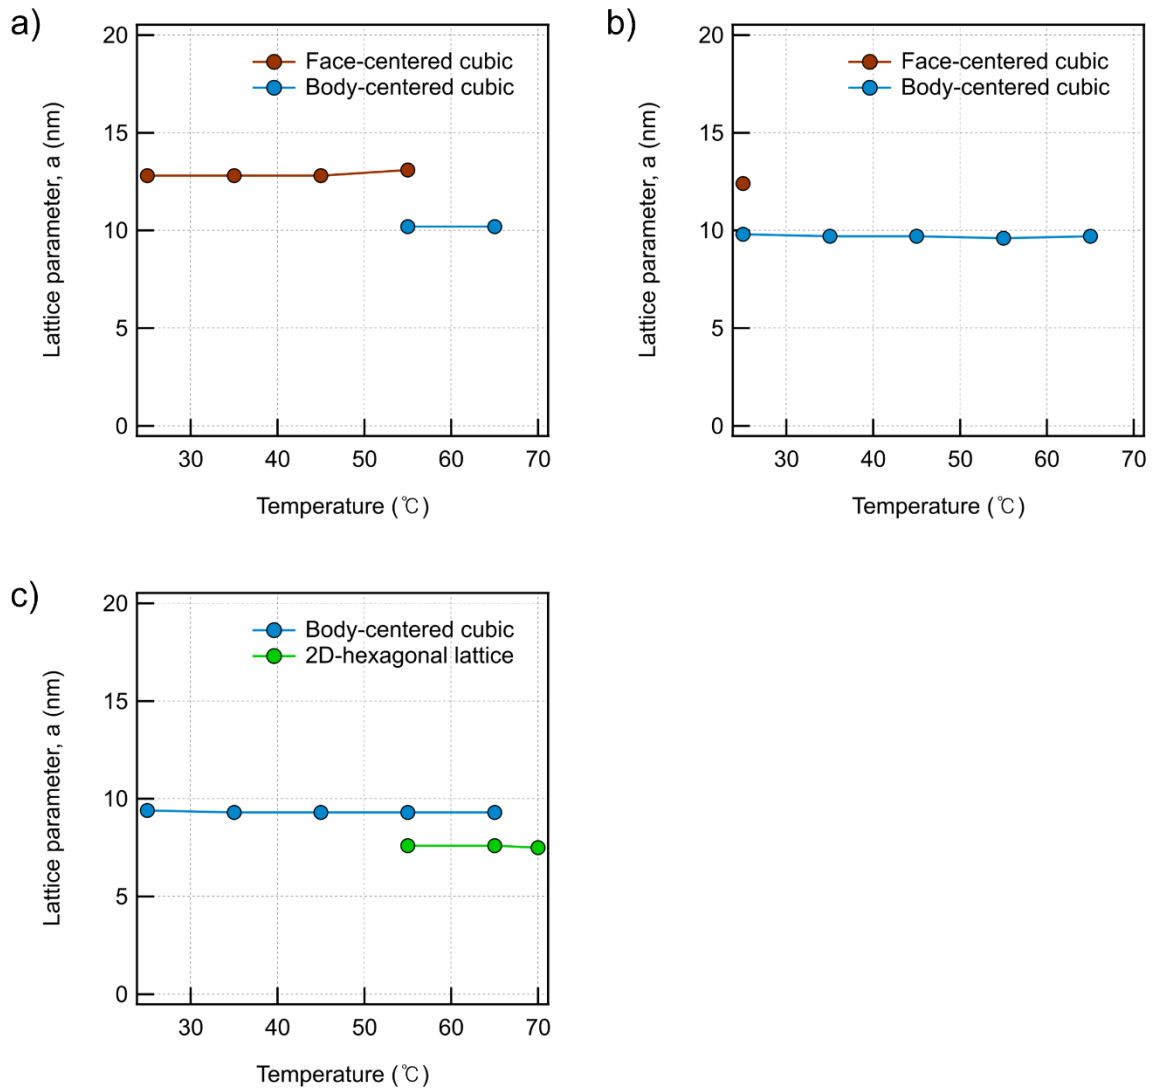

**Fig. S7.** Lattice parameters of a) Brij58 35 wt.%, b) Brij58 40 wt.%, and c) Brij58 50 wt.% in aqueous solution (where lattice parameters were calculated by the equation of  $a = \frac{2\pi}{q_{111}} \times \sqrt{3}$ ,  $\frac{2\pi}{q_{110}} \times \sqrt{2}$ , and  $\frac{2\pi}{q_{100}} \times \frac{2}{\sqrt{3}}$  for the face-centered cubic, the body-centered cubic, and the 2D-hexagonal lattice, respectively).



- Lattice parameters obtained from SAXS analysis of Brij58/AuNP/water complexes

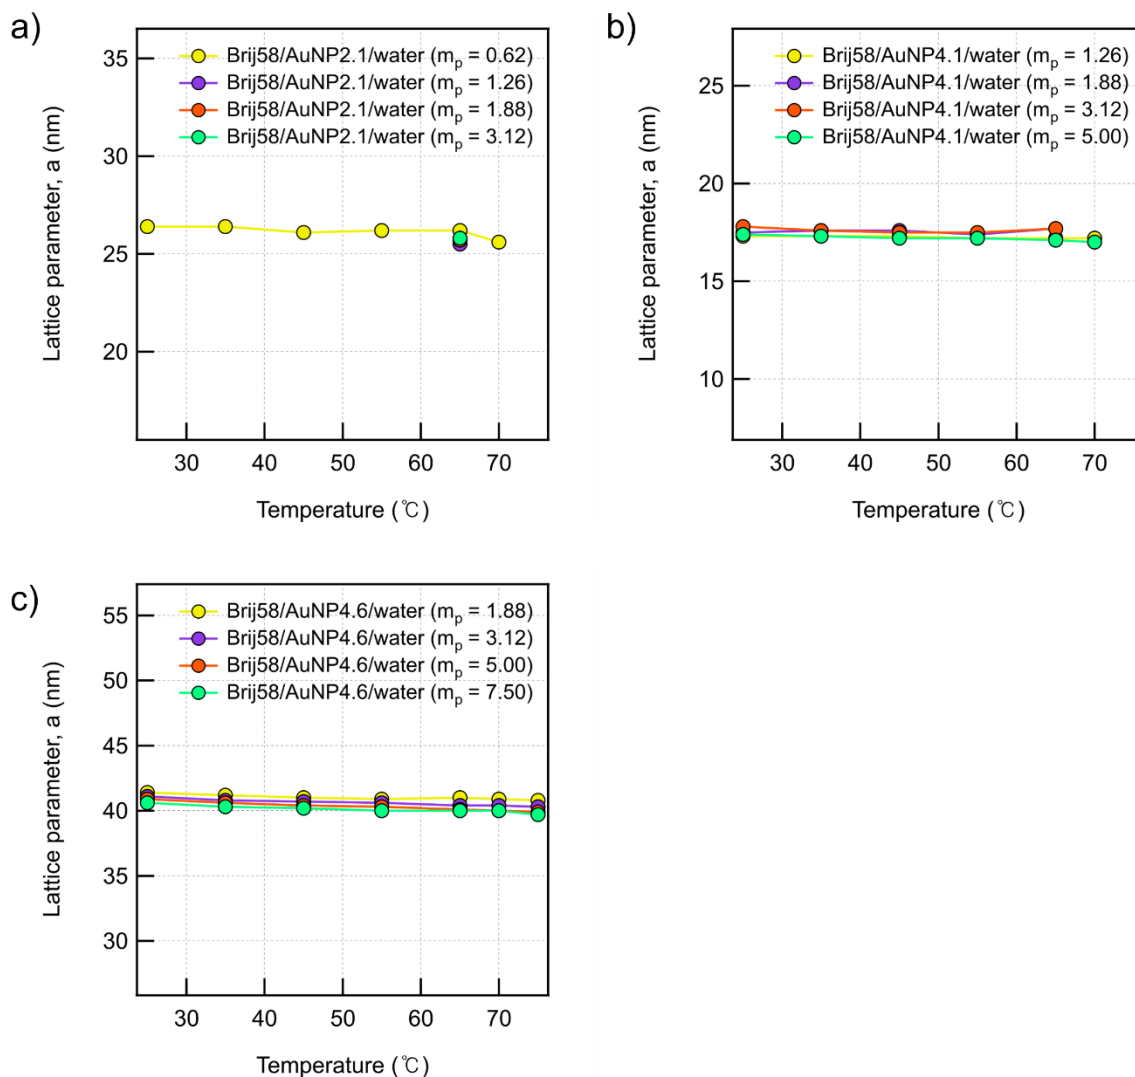

**Fig. S8.** Lattice parameter of the a) Brij58/AuNP2.1/water, b) Brij58/AuNP4.1/water, and c) Brij58/AuNP4.6/water complexes obtained from SAXS analysis. The lattice parameters were calculated by the equation of  $a = \frac{2\pi}{q_{111}} \times \sqrt{3}$ ,  $a = \frac{2\pi}{q_{100}} \times \frac{2}{\sqrt{3}}$ , and  $a = \frac{2\pi}{q_{200}} \times 2$  for the  $\text{Li}_3\text{Bi}$ -type, the  $\text{AlB}_2$ -type, and the  $\text{NaZn}_{13}$ -type structures, respectively.

- Simulation of structure factor for FCC-based BNSLs

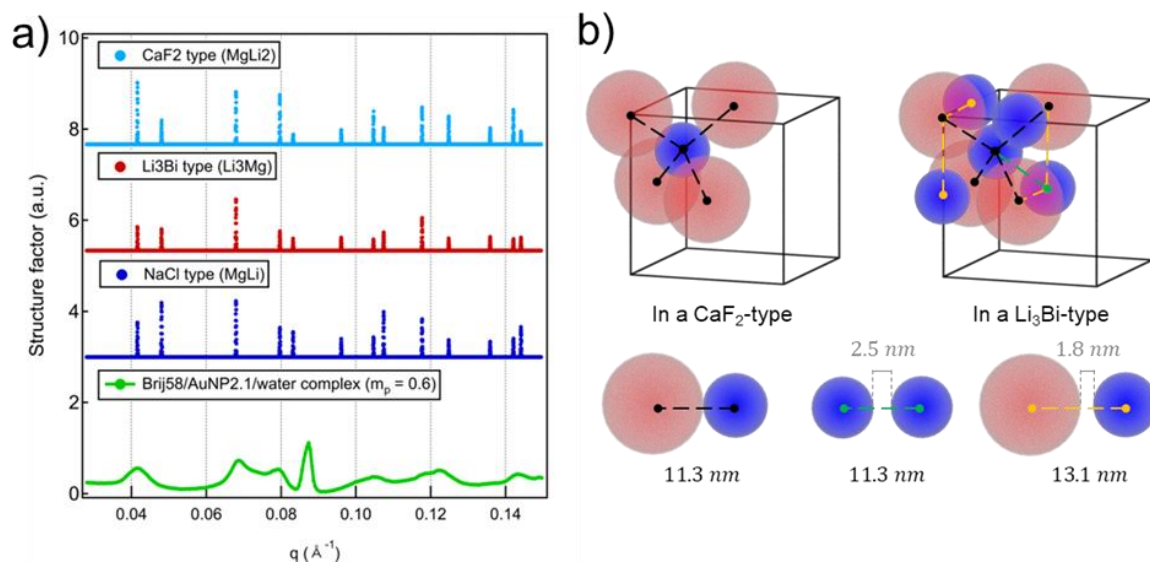

**Fig. S9.** a) The calculation of structure factors for the CaF<sub>2</sub>- and Li<sub>3</sub>Bi-type structures. b) Consideration of structural stability of CaF<sub>2</sub>- and Li<sub>3</sub>Bi-type structures.

- Calculation of packing efficiency of  $\text{AlB}_2$ -,  $\text{CaF}_2$ -,  $\text{Li}_3\text{Bi}$ -,  $\text{NaZn}_{13}$ -, and  $\text{ZnS}$ -type BNSLs

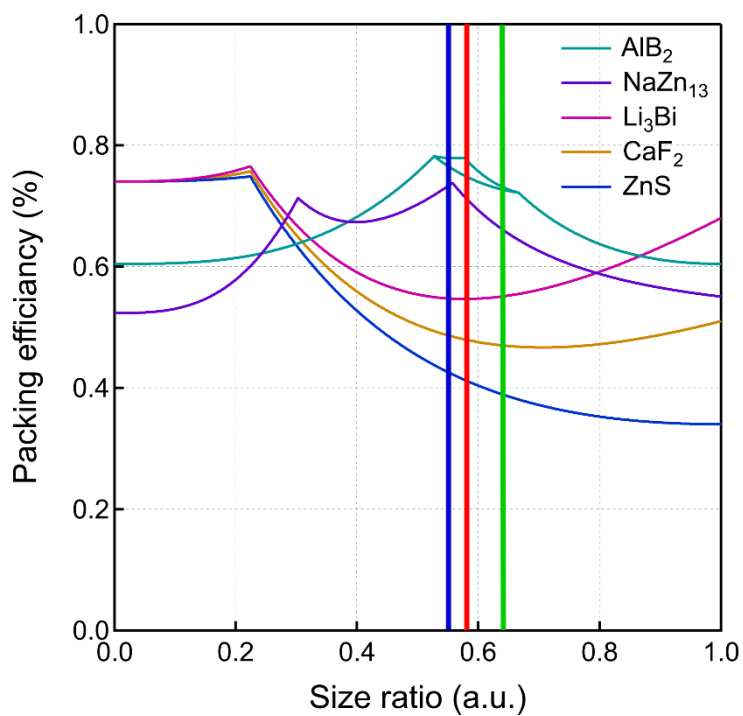

**Fig. S10.** Packing efficiency of the  $\text{AlB}_2$ -,  $\text{NaZn}_{13}$ -,  $\text{Li}_3\text{Bi}$ -,  $\text{CaF}_2$ -, and  $\text{ZnS}$ -type BNSLs, where vertical lines indicate a size ratio of 0.55, 0.58, and 0.64 for blue, red and green, respectively.

**Table S1.** Relative ratio of AuNPs (Brij58/AuNP/water = 20/  $m_p$  /80 by weight) before evaporation and the calculated number ratio of two particles (surfactant micelles ( $n_{mic}$ ):encapsulated AuNPs ( $n_{AuNP}$ )).

| Label                           | $m_p$ | $n_{mic} : n_{AuNP}$ |
|---------------------------------|-------|----------------------|
| Brij58/AuNP2.1/water<br>complex | 0.6   | 20 : 1               |
|                                 | 1.3   | 9 : 1                |
|                                 | 1.9   | 5 : 1                |
|                                 | 3.1   | 3 : 1                |
| Brij58/AuNP4.1/water<br>complex | 1.3   | 79 : 1               |
|                                 | 1.9   | 52 : 1               |
|                                 | 3.1   | 30 : 1               |
|                                 | 5.0   | 17 : 1               |
| Brij58/AuNP4.6/water<br>complex | 1.9   | 74 : 1               |
|                                 | 3.1   | 43 : 1               |
|                                 | 5.0   | 26 : 1               |
|                                 | 7.5   | 16 : 1               |
